# Supplementary material for: Limits to the Rate of Adaptive Substitution in Sexual Populations
Source: PubMed Central journal article supplement (PMC3369949; doi:10.1371/journal.pgen.1002740), 2012-06-07
Supplement: pgen.1002740.s011.pdf [file pgen.1002740.s011.pdf]

## Text S1 Complete recombination

We checked the effect of fitness variance in the absence of linkage disequilibrium by simulating a large number of concurrent selective sweeps. The population is represented by two lists: the numbers of copies of rare favorable alleles,  $\underline{n}$ , and the frequencies of common alleles,  $\underline{p}$ . Whenever an allele rises above 100 copies, it is assumed to increase deterministically: therefore, it is deleted from the first list, and its frequency added to the second list. In each generation, a Poisson number of new mutations is added, with expectation  $NU$ , and each in a single copy. The common allele frequencies  $\underline{p}$  evolve deterministically, so that  $p_i \rightarrow \frac{1+s}{1+sp_i} p_i$  every generation. The key step is to draw the number of copies of each rare allele. For each locus, the distribution of frequencies of genetic backgrounds is calculated. For example, a gene at locus 1 will find itself on background 000...0 with probability  $q_2 \dots q_k$ ; with  $k$  loci, there are  $2^{k-1}$  possible backgrounds for each locus. However, we only need to track the numbers of each fitness class, defined by the number of favorable alleles it carries. The  $n_i$  copies at locus  $i$  are distributed over the possible fitness classes with multinomial probability, and for each fitness class, a Poisson number of offspring is drawn with the appropriate expectation. The rate of sweeps is measured after 200 generations. Figure S1 shows a close match between the simulated and predicted rate of accumulation of favorable alleles.
