# Supplementary material for: Limits to the Rate of Adaptive Substitution in Sexual Populations
Source: PubMed Central journal article supplement (PMC3369949; doi:10.1371/journal.pgen.1002740), 2012-06-07
Supplement: pgen.1002740.s013.pdf [file pgen.1002740.s013.pdf]

### Text S3 Average fixation probability

We wish to find the rate of change of the average probability of fixation of a focal allele,

$$\partial_t \bar{P} = \sum_{\underline{X}} g(\underline{X}) \partial_t P(\underline{X}) + \sum_{\underline{X}} \partial_t g(\underline{X}) P(\underline{X}). \quad (21)$$

The first sum is given by the average of Eq. (2), weighted by genotype frequencies:

$$-\sum_{\underline{X}} g(\underline{X}) \partial_t P(\underline{X}) = s\bar{P} + \sum_{\underline{X}} g(\underline{X}) S(\underline{X}) P(\underline{X}) + \sum_{\underline{X}, \underline{Y}} g(\underline{X}) r(\underline{X}, \underline{Y}) (P(\underline{Y}) - P(\underline{X})) - \frac{1}{2} \sum_{\underline{X}} g(\underline{X}) P(\underline{X})^2 \quad (22)$$

To calculate the second sum in Eq. (21), we require the rate of change of background frequencies:

$$\partial_t g(\underline{X}) = S(\underline{X}) g(\underline{X}) + \frac{1}{2} \sum_{\underline{Y}} (g(\underline{Y}) R(\underline{Y}, \underline{X}) - g(\underline{X}) R(\underline{X}, \underline{Y})), \quad (23)$$

where  $R(\underline{X}, \underline{Y})$  is the rate at which individuals with genotype  $\underline{X}$  recombine to form individuals with genotype  $\underline{Y}$ . (The factor of 1/2 in Eq. (23) is necessary because each recombination event involves two parents recombining to form two offspring.) Note that unlike  $r(\underline{X}, \underline{Y})$  (the rate at which recombination moves the focal allele from background  $\underline{X}$  to background  $\underline{Y}$ ), the definition of  $R(\underline{X}, \underline{Y})$  does not involve the focal allele, and in general  $r(\underline{X}, \underline{Y}) \neq \frac{1}{2} R(\underline{X}, \underline{Y})$ . However, it is true that  $\sum_{\underline{X}} g(\underline{X}) r(\underline{X}, \underline{Y}) = \frac{1}{2} \sum_{\underline{X}} g(\underline{X}) R(\underline{X}, \underline{Y})$  for all  $\underline{Y}$ , since both sides are expressions for the total rate of recombination events producing offspring with genotype  $\underline{Y}$ . Thus, when we substitute Eqs. (22) and (23) into Eq. (21), we find that the terms involving  $S$  and  $r$  cancel, leaving

$$-\frac{\partial \bar{P}}{\partial t} = s\bar{P} - \frac{1}{2} \sum_{\underline{X}} g(\underline{X}) P(\underline{X})^2. \quad (24)$$

Rewriting the second term in terms of the mean and variance of  $P(\underline{X})$ , we obtain Eq. (3).
