# Supplementary material for: Limits to the Rate of Adaptive Substitution in Sexual Populations
Source: PubMed Central journal article supplement (PMC3369949; doi:10.1371/journal.pgen.1002740), 2012-06-07
Supplement: pgen.1002740.s016.pdf [file pgen.1002740.s016.pdf]

## Text S6 Variation among backgrounds and spatial variation

Whitlock [58] has developed a simple approximation for the fixation probability in a spatially subdivided population:  $\bar{P} = 2s(N_e/N)(1 - F_{ST})$ , where  $N_e$  is the long-term effective size of the whole population, and  $F_{ST}$  is the standardized variance of neutral allele frequency in that population. This bears some resemblance to our general expression for fixation probability,  $\bar{P} = 2s/[V(1 + C.V.)]$  (from Eq. (3)): both expressions involve a measure of variation between demes or genetic backgrounds, and both show that this variation necessarily reduces fixation probability. However, there are also several crucial differences.  $F_{ST}$  measures the variance in neutral allele frequency, whereas C.V. is the coefficient of variation of fixation probability between demes or genetic backgrounds. [58]’s  $N_e$  measures the long-term loss of variation and is equivalent to our  $\Upsilon$ , whereas our  $V$  measures the short-term rate of drift. The derivations are also quite different. [58] makes the approximation that there is a separation of timescales, such that the overall allele frequency,  $\bar{p}$ , diffuses with mean change  $M = s(1 - F_{ST})$ , and variance  $\bar{p}q/(2N_e)$ . In contrast, we average over the set of coupled equations for fixation probability  $P(\underline{X})$  in each location or genetic background,  $\underline{X}$ . We have shown that  $\Upsilon$  (and therefore [58]’s  $N_e$ ) may be greatly reduced while  $\bar{P}$  (i.e., C.V. and  $V$ ) is not much affected, and, conversely, that  $\bar{P}$  may decrease while  $\Upsilon$  remains nearly constant (Figure 6). It might still be the case that [58]’s approximation applies to our model, if  $F_{ST}$  is sufficiently large for cases where C.V. is large. However, we do not see how to show this, by calculating  $F_{ST}$  in a general way. Moreover, our results for a linear map apply when recombination and selection act at similar rates, so that the separation of timescales required by Whitlock’s derivation does not apply.
